# Supplementary material for: A facile nonaqueous route for fabricating titania nanorods and their viability in quasi-solid-state dye-sensitized solar cells
Source: Royal Society of Chemistry journal article supplement (doi:10.1039/b921373b), 2010-01-01
Supplement: b921373b.pdf [file b921373b.pdf]

### Supplementary Information

A Facile Nonaqueous Route for Fabricating Titania Nanorods and their Viability in Quasi-Solid-State Dye-Sensitized Solar Cell

Jaykrushna Das,<sup>†</sup> Flavio S. Freitas,<sup>‡</sup> Ivana Radosavljević Evans,<sup>□</sup> Ana F. Nogueira<sup>‡</sup> and Deepa Khushalani<sup>†\*</sup>

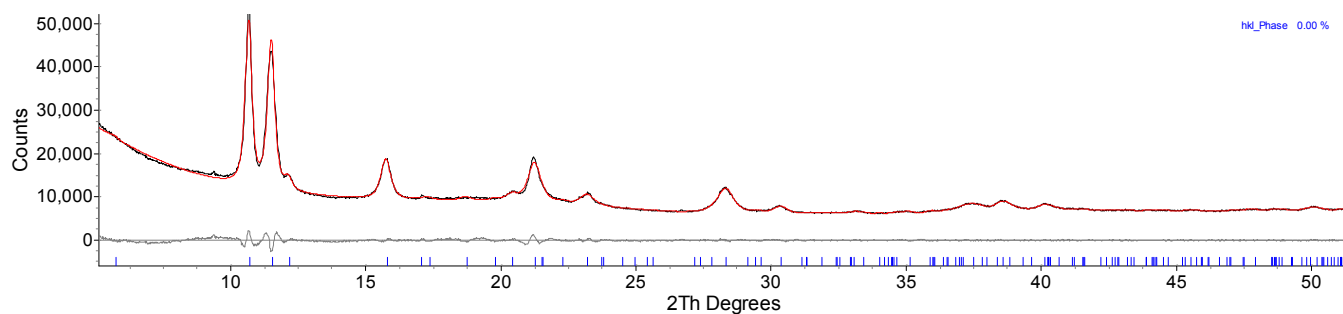

Figure S1. Pawley Fit of As-synthesized Titanium Glycerolate (Space group P2/c;  $a = 8.37515$  Å,  $b = 15.33781$  Å,  $c = 5.57151$  Å,  $b = 99.824$ )

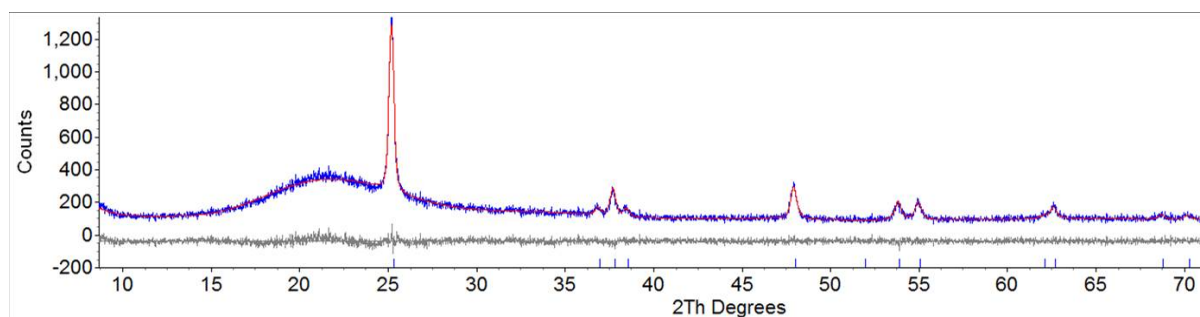

Figure S2. Rietveld fit to the PXRD pattern of anatase obtained as a single-phase product by thermal decomposition of the titanium glycerolate precursor ( $R_{wp} = 8.52\%$ ).

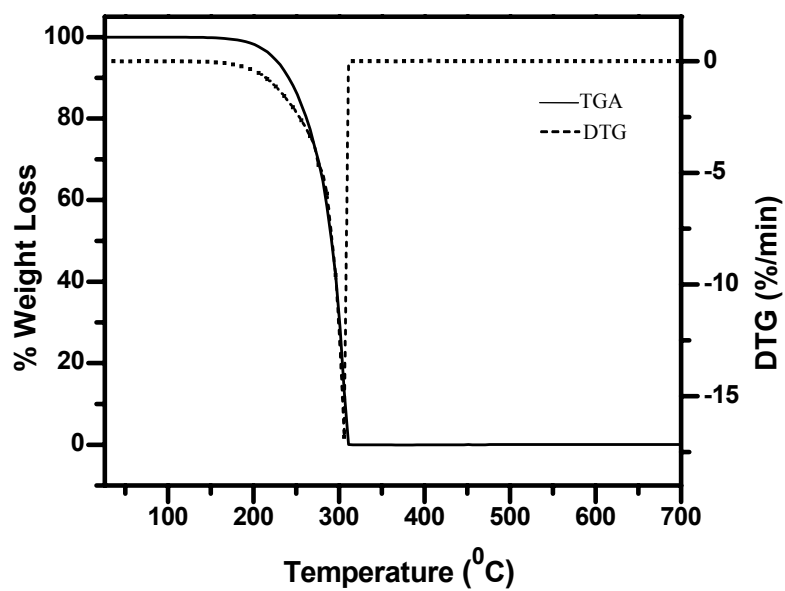

Figure S3. TGA pattern showing weight loss for pure Glycerol. The minimum for the DTG trace is at 307 °C.

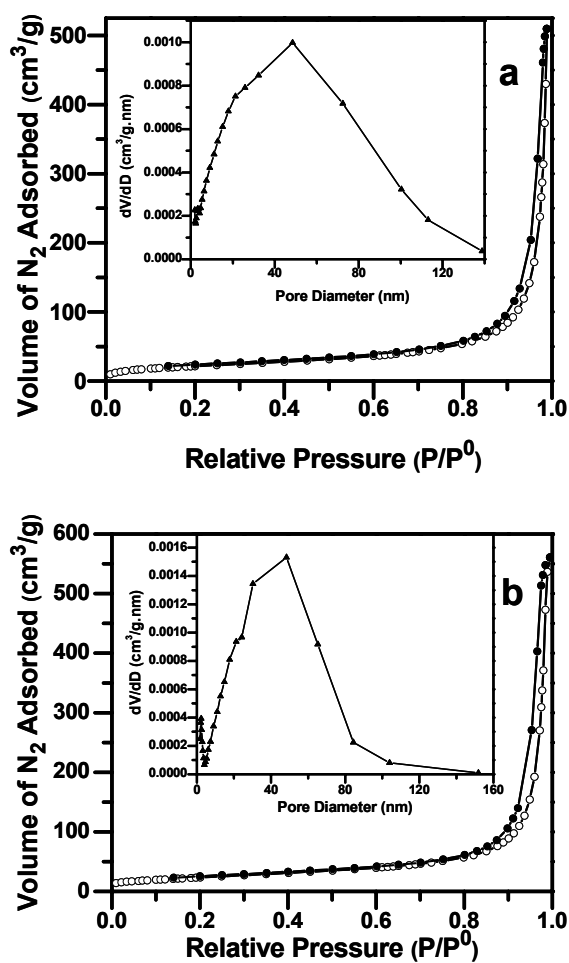

Figure S4. N<sub>2</sub> adsorption-desorption isotherms of (a) titanium glycerolate fibers, and (b) anatase (-○- adsorption, -●- desorption). Inset shows the BJH pore size distributions of the respective samples.
